# Supplementary material
Source: Research Square preprint supplement (doi:10.21203/rs.3.rs-9309805/v1)
Supplement: Supplementary file 1 [file 54fe34ffd9248eea53269a89.xlsx]

## Sheet: Sheet1
Email Address	Gender	Age	Educational Qualification	Occupation	District	KB1	KB2	KB3	KB4	KB5	KB6	SP1	SP2	SP3	SP4	SP5	SP6	MF1	MF2	MF3	MF4	MF5	MF6	ATT1	ATT2	ATT3	ATT4	ATT5	IN1	IN2	IN3	IN4	IN5
prabhjot9singh90@gmail.com	2	1	1	2	1	5	4	4	3	5	4	4	4	5	3	4	4	4	4	4	5	4	4	4	4	3	4	4	5	4	4	4	4
kamalphogatkp@gmail.com	1	1	2	1	2	4	4	3	4	5	5	4	5	4	4	4	4	5	5	4	4	5	5	5	3	4	5	4	4	4	5	4	5
21mannigupta.mg@gmail.com	2	1	3	2	5	5	4	5	5	4	5	5	5	5	5	5	5	4	5	5	4	4	4	5	4	4	4	5	5	3	4	4	5
vishalrajput708266@gmail.com	1	1	2	1	6	5	4	5	5	4	4	5	5	5	5	5	5	4	4	3	3	3	3	4	4	5	4	5	5	3	4	5	4
ravim2646@gmail.com	1	1	2	2	1	3	2	3	2	3	2	5	5	5	5	4	5	4	4	3	5	4	4	5	4	4	5	4	5	3	3	3	5
kiransharma2512003@gmail.com	2	1	1	1	2	5	5	5	4	5	5	5	5	5	5	5	5	5	4	5	5	5	5	5	5	5	5	5	1	3	1	2	2
imrajniyadav@gmail.com	1	1	2	1	7	1	2	1	1	2	1	1	1	1	2	1	2	1	1	1	2	1	1	1	1	2	1	3	3	1	2	3	1
nananagi@gmail.com	2	1	3	5	7	4	5	4	4	5	4	4	4	3	3	3	4	4	4	3	5	3	4	4	4	3	5	3	2	3	1	3	2
jagjit659w@gmail.com	2	2	2	2	1	5	4	5	4	4	5	4	4	4	4	4	4	4	5	4	4	4	4	4	5	4	4	5	4	5	5	4	5
richachauhan8707@gmail.com	2	1	2	1	2	5	5	4	4	4	5	4	4	4	4	4	3	5	4	4	4	4	4	5	5	4	4	3	4	3	4	5	4
priusharma17@gmail.com	2	1	1	1	8	4	5	4	4	5	4	4	4	5	5	4	4	5	4	3	5	4	4	4	4	4	5	4	4	5	5	3	4
amritachawla69@gmail.com	2	1	2	2	7	1	2	1	2	1	2	3	3	3	3	4	3	4	5	5	5	5	5	5	5	4	5	3	3	4	4	5	5
khushbuaggarwal4502@gmail.com	2	1	2	1	1	5	4	4	4	5	4	4	4	3	4	3	3	5	4	4	4	3	3	4	5	3	4	5	4	3	4	4	3
kanishka.stepup@gmail.com	2	1	3	1	2	4	5	4	5	4	5	4	4	3	4	4	3	5	5	3	4	5	4	5	4	4	4	4	4	5	5	5	5
renuatrri@gmail.com	2	1	2	2	8	3	3	2	3	3	2	4	4	3	3	3	3	5	4	4	4	3	5	5	4	5	5	3	4	4	5	4	3
ftyagi786@icloud.com	1	1	1	1	1	4	4	5	4	4	5	4	4	4	4	3	3	2	2	3	1	2	3	4	5	4	5	4	3	3	3	3	5
prathamsoni1818@gmail.com	2	2	2	1	2	5	5	4	5	5	4	4	3	4	4	4	3	5	4	3	4	3	5	4	5	3	4	5	5	4	5	4	4
devvart.yadav.1997@gmail.com	1	1	2	2	7	4	5	4	4	4	5	3	4	4	4	4	4	5	4	3	4	3	4	4	4	4	4	4	5	4	4	5	4
mpreeti241@gmail.com	2	1	2	1	1	4	5	5	4	5	5	4	5	4	4	3	2	4	5	5	4	3	4	4	4	4	4	5	4	3	4	3	4
shikha.sscs@gmail.com	2	1	1	1	7	4	4	4	4	5	4	4	4	4	4	4	4	5	4	5	5	3	4	4	5	5	4	4	4	4	5	5	5
monikasimli2003@gmail.com	2	2	2	2	7	5	4	4	5	5	4	4	3	4	3	4	4	4	5	4	5	4	4	5	5	4	5	4	5	3	3	5	5
vishalrajput708266@gmail.com	1	3	2	1	1	5	5	5	5	4	5	5	5	4	5	5	5	4	4	3	4	5	5	5	5	5	4	5	4	5	5	3	3
mdsufyanakhtar@gmail.com	2	1	2	1	7	3	2	3	3	2	2	4	4	4	3	4	4	5	5	4	5	3	4	4	5	4	4	5	4	3	4	4	5
rknew1611@gmail.com	2	1	2	2	2	4	5	4	4	5	4	4	4	4	4	4	4	5	5	5	5	5	4	5	4	5	5	4	5	4	3	4	4
itsjhaokip@gmail.com	2	2	1	1	1	4	4	5	5	4	4	5	4	4	4	4	4	1	1	3	1	1	2	5	5	4	4	4	4	3	4	3	4
pinkijangra0211@gmail.com	2	1	2	1	2	1	2	1	2	1	2	3	2	3	3	3	3	2	1	3	2	3	3	1	1	2	1	3	2	1	2	1	1
radhikarajput91917@gmail.com	2	1	2	2	2	4	5	3	4	5	4	3	3	3	3	3	3	5	4	5	5	5	4	4	4	4	5	3	3	4	5	4	4
sneha.sharma1681@gmail.com	2	2	2	1	1	5	5	4	4	4	5	4	4	4	4	3	4	5	5	4	5	3	5	5	5	4	4	5	5	4	4	4	4
anju1234.as@gmail.com	2	1	1	1	7	5	4	5	5	4	5	5	5	5	5	4	4	4	5	5	5	5	5	5	4	5	5	5	5	3	5	5	5
Shubhamaneja2@gmail.com	1	1	2	1	8	3	4	3	4	3	4	4	3	3	3	3	4	5	5	4	5	5	4	4	4	4	4	3	4	5	4	5	5
poojagothwal022@gmail.com	2	2	2	2	1	4	4	4	5	5	5	4	4	5	5	4	4	4	4	5	4	4	4	5	5	4	4	4	4	5	5	4	5
sspolestar378@gmail.com	2	1	2	1	7	2	1	3	2	1	2	2	2	2	2	2	2	2	2	1	1	2	2	5	4	4	5	2	2	1	1	2	1
nagakhetobo@gmail.com	2	2	1	1	7	5	5	4	4	5	4	4	4	3	3	3	3	4	5	3	5	3	3	4	4	3	5	3	3	3	4	4	3
pulkithasija@gmail.com	2	1	2	2	7	4	5	4	5	4	5	5	5	4	5	5	5	5	5	5	5	5	4	5	5	4	5	5	5	5	5	4	5
khetwalgourav15@gmail.com	1	1	2	1	1	4	4	5	5	4	4	4	4	5	5	4	4	5	4	4	4	4	5	4	4	3	4	4	4	5	5	5	5
dikshasharma11155@gmail.com	2	3	1	2	6	3	3	3	3	2	3	3	3	3	3	3	3	4	5	3	5	3	4	4	5	5	4	3	3	4	5	4	4
aakankshag112@gmail.com	1	2	2	2	6	4	5	4	4	4	4	5	4	4	4	4	4	4	4	4	5	4	5	4	4	4	4	4	4	5	4	3	4
anchalgoyal22222@gmail.com	2	1	2	2	6	4	5	4	5	4	5	4	3	3	4	5	4	5	5	5	5	5	5	4	4	4	5	5	4	5	5	3	4
tamannasharma19july@gmail.com	2	1	1	1	1	5	4	4	5	5	4	4	4	4	4	3	4	5	4	3	5	5	3	5	4	4	4	4	4	5	4	5	5
archananew12@gmail.com	2	2	2	1	7	4	4	5	4	5	5	4	4	5	4	4	5	5	4	5	5	4	4	4	4	4	5	4	5	5	5	5	5
manishagrewal69@gmail.com	2	1	2	2	7	4	4	4	5	4	4	5	4	4	4	5	4	5	4	3	4	3	4	4	5	3	4	3	4	5	4	5	5
choudharydikshant10@gmail.com	1	1	1	5	1	5	4	5	4	5	5	4	4	3	3	3	4	5	5	3	4	5	4	4	4	3	5	3	3	4	4	4	5
choudharysandeep.inno@gmail.com	1	2	2	5	8	4	3	4	4	5	4	4	4	3	4	4	4	5	5	4	4	4	4	4	5	5	5	4	4	5	5	4	5
sanjeev82014@gmail.com	1	1	2	2	8	2	3	2	3	3	2	3	3	3	3	3	3	5	5	3	4	3	4	5	4	3	4	4	4	4	4	5	5
savitakohar14@gmail.com	2	1	1	1	2	4	5	4	4	5	5	4	4	3	4	4	4	4	4	5	5	5	3	4	4	4	4	4	5	4	5	4	5
nishasihan123@gmail.com	2	2	2	2	1	4	4	5	4	5	5	4	4	4	5	5	5	5	5	3	5	5	4	4	5	4	5	4	4	4	5	4	4
skgauditor@gmail.com	2	3	2	1	7	4	5	5	5	5	4	4	4	4	3	3	3	5	4	3	4	4	3	5	4	3	4	3	3	4	4	3	4
monikadhanda003@gmail.com	2	1	1	5	7	4	4	4	4	5	4	4	5	4	3	4	4	4	5	4	4	4	3	4	5	4	3	5	4	4	4	3	3
nikita.monnni11@gmail.com	2	2	2	3	7	5	5	4	4	4	4	3	4	3	3	4	3	5	5	5	4	5	4	5	4	3	4	4	4	4	4	4	4
stripathi2806@gmail.com	2	1	2	2	1	5	5	4	5	4	5	5	4	4	4	4	4	5	4	3	5	3	4	4	4	4	5	3	3	5	5	4	5
shubhamsangwan2503@gmail.com	1	1	2	2	8	5	5	5	4	5	4	5	5	5	5	4	5	5	4	3	5	3	3	5	5	4	4	5	4	4	5	5	4
dikshasharma11155@gmail.com	2	2	1	5	8	5	4	5	4	5	4	4	4	3	3	3	3	3	5	5	3	3	3	5	5	3	5	3	3	4	5	4	5
shikharathor27@gmail.com	2	1	2	3	8	5	5	4	5	4	4	5	5	4	5	4	3	4	4	3	5	5	3	4	3	4	4	4	4	4	5	4	4
dddevenderdhillon@gmail.com	2	1	2	1	1	4	5	4	5	3	4	3	4	4	3	3	3	4	4	4	4	4	3	5	4	3	4	3	3	4	4	5	5
sagar.age21@gmail.com	1	3	2	2	7	5	5	5	4	4	3	3	3	3	3	3	3	4	5	3	4	4	4	5	4	3	4	4	3	3	4	4	4
alishachamling72@gmail.com	2	3	1	5	7	4	5	4	4	5	4	3	4	5	5	3	4	5	5	5	5	5	5	5	5	5	5	4	4	4	5	4	5
apvissu72@gmail.com	2	1	2	2	7	4	4	5	5	5	4	4	5	5	5	4	5	3	4	4	4	3	4	5	4	5	5	5	3	4	5	4	5
richachauhan8707@gmail.com	2	1	2	5	1	5	4	5	5	4	5	5	5	4	3	4	4	4	5	4	4	3	5	4	5	4	5	5	5	4	5	5	4
monikakeshav01@gmail.com	2	3	1	5	7	4	5	4	5	5	4	4	3	4	4	4	4	4	5	3	5	5	4	4	5	3	4	4	5	4	5	4	4
rs9582383397@gmail.com	2	3	2	2	7	3	2	2	2	3	2	5	5	5	5	4	5	4	4	3	4	3	5	4	5	4	5	5	5	4	4	4	4
sumithooda061@gmail.com	1	1	2	5	7	5	5	4	4	5	4	4	5	5	5	5	5	5	4	4	5	4	5	4	5	5	4	4	5	3	4	4	5
rawatyashikarawat037@gmail.com	2	1	1	5	1	4	5	5	4	5	5	5	4	4	4	5	5	4	4	5	5	5	4	5	4	5	4	5	5	4	5	4	4
joelsingson33@gmail.com	1	3	2	2	8	4	5	5	5	4	4	5	5	5	5	3	5	4	5	4	4	4	5	4	5	5	5	5	5	3	4	5	5
str9449@gmail.com	1	3	2	5	8	4	5	4	5	4	4	4	5	5	5	5	5	4	4	5	5	3	5	4	5	5	5	4	5	4	4	3	4
prathamsoni1818@gmail.com	2	1	2	5	8	4	4	5	4	5	5	4	3	4	3	3	3	5	5	5	5	5	4	4	4	4	4	5	4	4	5	5	4
rizulyadav1406@gmail.com	2	3	1	2	2	5	4	5	4	3	4	5	5	4	4	3	3	5	4	4	3	4	4	4	4	4	5	4	4	5	4	3	3
lakraronald@10gmail.com	2	1	2	5	1	4	5	4	5	4	4	4	4	4	4	4	4	4	5	4	5	3	4	5	4	5	4	4	4	4	4	4	4
jaga149213@gmail.com	1	3	2	5	6	4	5	3	5	5	4	4	3	5	4	4	4	4	3	4	5	5	3	5	5	3	5	5	5	4	4	5	4
nitinparkash2020@gmail.com	1	1	1	2	6	4	5	4	4	5	4	4	5	5	3	3	3	5	4	4	5	3	5	5	4	5	4	3	5	4	5	4	4
tushar.sscs05@gmail.com	1	1	2	5	1	5	4	4	5	4	4	4	4	3	5	4	3	4	5	5	4	4	4	4	5	4	4	3	3	3	4	5	4
anmolchhabra3011@gmail.com	1	3	2	5	7	4	5	4	4	4	5	4	5	3	5	4	4	4	4	3	4	3	4	4	4	4	4	4	4	4	5	4	5
vikasgulia332@gmail.com	1	1	2	2	7	5	5	4	5	5	4	5	5	5	3	3	4	4	5	3	4	3	4	4	4	4	4	4	4	4	4	4	4
preshitamang@gmail.com	1	1	2	5	7	5	4	5	4	4	5	5	4	4	5	2	3	3	5	5	5	4	5	5	5	4	5	5	5	4	5	4	4
gsrishti411@gmail.com	2	3	2	5	1	4	4	5	5	4	4	5	5	4	5	5	5	4	4	5	5	3	4	4	4	5	5	4	5	3	4	3	4
chingling564@gmail.com	1	1	2	2	7	2	2	3	2	3	3	5	4	4	5	5	5	3	4	5	4	3	4	5	5	5	5	5	4	4	4	4	4
sunil.icalwar@gmail.com	1	1	2	3	6	4	5	5	4	4	4	5	5	5	5	5	4	4	4	5	5	4	5	4	5	5	4	5	5	4	5	4	4
ashmit8130@gmail.com	2	1	2	5	1	5	5	4	4	4	5	5	4	4	4	4	4	5	5	4	4	5	4	5	5	4	4	5	5	3	5	4	4
simransh212002@gmail.com	2	1	2	2	6	4	3	4	4	5	4	3	4	3	3	3	3	5	5	5	5	4	4	4	4	4	4	4	4	4	4	4	4
sneha.sharma582002@gmail.com	2	3	2	3	7	5	5	5	5	4	4	5	4	5	4	5	5	5	5	5	5	5	4	5	4	5	5	5	5	4	4	5	5
chimanshutondwal@gmail.com	2	1	2	3	2	4	4	4	5	4	5	5	5	4	3	3	3	5	5	4	5	4	4	4	5	4	4	4	4	4	4	5	5
nm347425@gmail.com	1	1	2	2	7	5	5	5	4	4	5	4	4	4	4	3	4	5	5	4	4	4	5	4	4	5	5	4	4	4	4	4	5
sarikasuthar2607@gmail.com	2	3	2	5	1	5	5	5	4	5	4	3	5	4	4	5	5	5	5	4	5	4	4	4	4	5	4	3	4	4	5	4	4
anamika1412003@gmail.com	2	1	2	2	8	5	4	4	5	4	4	4	4	4	3	5	5	5	4	3	5	3	4	5	4	5	4	4	5	4	4	4	4
sonushidhi425@gmail.com	1	1	2	2	8	4	5	5	4	5	5	4	3	3	3	3	3	5	4	5	5	5	4	5	5	4	5	5	5	4	5	4	4
chishitovikali89@gmail.com	1	2	2	5	7	4	5	4	4	4	4	4	4	4	4	3	4	4	5	4	3	3	4	4	4	4	5	4	4	4	4	5	4
skinha33@gmail.com	2	1	2	2	1	5	4	5	4	4	5	3	5	5	4	5	4	3	4	3	4	3	3	4	5	5	4	4	3	4	5	4	4
Asambehoizeliang@gmail.com	2	3	2	3	5	5	4	5	5	5	5	4	4	4	3	3	3	5	3	4	4	5	4	4	5	4	5	4	4	4	4	5	4
jkajal807662@gmail.com	2	1	3	3	2	5	3	5	5	4	5	5	5	5	5	5	5	3	5	5	4	4	4	4	4	5	4	5	5	4	4	4	5
varshaphalswal16998@gmail.com	2	1	2	2	6	5	5	5	5	5	5	4	4	5	5	3	4	4	5	4	5	4	4	5	4	5	5	5	5	4	5	5	4
kharopunk@gmail.com	2	2	2	3	1	5	4	5	4	3	5	4	4	4	3	3	3	5	5	4	4	3	3	4	4	5	5	4	4	5	4	5	5
kartikaysherawat30@gmail.com	1	1	2	2	6	4	5	4	5	5	4	5	5	5	5	3	4	5	4	5	4	5	5	5	5	5	4	5	4	4	4	5	4
osbertsp@gmail.com	2	1	2	2	6	5	5	5	5	5	4	5	4	5	5	5	5	5	4	5	5	4	5	4	5	5	5	5	5	5	4	5	4
hemlatakaushik115@gmail.com	2	3	2	2	2	5	5	4	5	5	5	5	4	5	4	5	5	4	5	4	3	3	4	5	4	5	4	5	4	4	5	4	4
muskanshaarma8059@gmail.com	2	1	2	3	1	5	4	5	5	5	4	5	5	5	3	5	4	5	5	4	5	4	5	5	5	5	5	3	5	4	5	3	3
varshasharmavat3008@gmail.com	2	3	2	5	6	5	5	4	5	4	5	5	5	5	5	5	5	5	5	5	4	5	4	5	5	4	5	5	4	4	4	4	5
poojagothwal022@gmail.com	2	1	2	3	7	4	4	4	4	5	4	4	4	4	3	4	4	5	5	4	4	3	3	4	5	4	5	3	4	4	5	5	4
ritikananosharma21@gmail.com	2	1	2	2	1	5	5	5	5	4	5	5	4	5	4	5	4	4	5	5	4	4	5	5	5	5	5	5	5	4	4	5	5
donaldumdorbarca@gmail.com	2	1	3	4	2	3	2	3	3	2	2	4	4	4	4	5	5	5	5	4	5	5	5	4	5	4	4	3	4	4	4	5	4
pster5.prernasociety@gmail.com	2	2	3	2	7	5	5	5	4	5	4	4	3	3	4	4	4	4	4	3	5	4	4	4	4	3	4	4	4	4	5	5	4
drlakshem@gmail.com	2	1	2	3	1	4	5	4	5	4	5	5	4	5	5	4	5	5	4	3	4	3	5	1	1	2	1	1	3	3	4	5	5
nm347425@gmail.com	2	1	3	3	7	4	5	5	4	5	4	3	3	4	4	5	3	4	5	5	5	5	4	4	4	4	4	4	4	4	4	4	4
priyagulia12@gmail.com	2	1	2	2	2	4	4	4	4	5	5	4	3	4	5	3	3	4	4	4	5	4	4	5	4	3	5	5	4	4	4	5	4
vishalrajput708266@gmail.com	1	1	3	3	1	4	5	3	4	4	4	4	4	4	3	4	3	5	5	3	4	3	3	5	5	5	4	4	4	4	5	5	4
jha8gaurav@gmail.com	1	1	2	2	8	5	4	4	5	4	5	5	4	3	4	4	4	4	5	5	4	3	5	4	4	5	5	4	5	5	4	5	4
abhatt0612@gmail.com	2	1	3	3	8	5	4	5	5	4	4	5	5	4	4	5	4	5	5	4	5	4	5	5	4	5	5	4	4	4	4	4	5
sagardhingra05@gmail.com	1	1	2	4	1	5	5	3	5	4	5	5	5	4	4	4	4	5	5	4	4	4	5	4	5	4	5	4	5	4	5	5	5
ankuryadav0765@gmail.com	1	1	3	2	2	5	5	4	4	5	4	4	5	4	5	5	5	4	4	4	4	5	3	5	4	3	5	4	4	5	4	5	4
kiumukamjas@gmail.com	1	2	1	4	8	5	4	5	5	5	5	5	5	4	5	5	5	5	5	3	4	5	4	5	5	5	4	5	5	4	4	5	5
abhilashakumari29797@gmail.com	2	1	3	2	8	5	5	5	4	5	4	4	5	5	4	5	5	5	4	4	4	3	3	4	3	5	5	5	5	4	4	5	4
Keshav040404@gmail.com	1	1	3	2	1	5	5	5	4	5	5	5	5	5	5	5	5	5	4	4	4	5	5	5	4	5	4	4	5	5	5	3	5
hemraj8212@gmail.com	1	1	3	3	2	5	4	5	4	4	5	5	5	5	5	5	5	2	2	3	2	3	1	4	5	4	5	5	4	4	5	4	4
rajeevsijariya@gmail.com	1	1	2	4	8	5	5	4	4	4	4	5	4	5	4	3	3	5	5	4	4	5	3	4	4	4	5	3	4	4	4	4	4
irajputkiran2@gmail.com	1	1	3	1	8	4	4	4	5	4	4	3	3	3	3	4	4	4	4	3	4	4	5	4	4	3	3	4	3	4	5	4	5
Sahilchopra13@icloud.com	1	1	3	2	1	2	2	2	3	3	2	5	3	3	3	4	5	5	5	4	5	3	3	4	5	4	5	5	5	4	5	4	5
sonali.sharma@innovalance.com	2	1	2	3	8	4	5	5	5	4	4	4	4	4	4	5	5	4	5	4	4	4	5	5	5	4	5	5	4	5	4	5	4
thoireiamanda@gmail.com	2	2	3	4	8	4	4	5	5	5	5	4	4	4	4	4	5	5	5	3	5	3	4	5	3	5	4	4	4	3	4	5	5
knchnshrm992@gmail.com	2	1	2	2	1	5	4	4	4	4	4	5	4	4	5	4	4	5	5	5	5	4	5	5	5	5	5	5	4	4	5	5	4
shriyawalecha71@gmail.com	2	2	2	4	2	5	5	4	4	5	5	5	4	5	5	5	4	5	5	5	5	5	5	5	4	4	5	4	5	4	5	4	5
harshjakhar08@gmail.com	1	1	3	4	8	2	3	3	3	3	2	5	5	5	5	5	5	4	5	4	5	5	5	5	4	5	5	5	3	4	5	4	5
khanakgajmoti@gmail.com	2	2	3	2	8	1	2	2	2	1	1	3	3	2	3	2	3	1	1	2	1	1	2	2	1	1	2	2	1	2	2	1	1
tamannasharma19july@gmail.com	2	2	2	4	2	5	5	5	4	4	4	5	5	4	5	4	4	5	5	5	5	3	5	4	5	5	5	4	5	4	5	4	4
4mandeepraj@gmail.com	1	2	3	4	8	5	4	5	5	4	5	5	5	5	5	5	4	4	4	3	5	3	4	4	3	4	5	5	5	4	5	4	4
Nidhimalhotra436@gmail.com	2	1	2	2	8	5	5	4	5	4	4	5	3	5	4	4	4	4	5	4	4	3	5	4	5	5	5	5	5	4	5	4	4
Veerharitash88@gmail.com	2	2	2	4	2	4	5	5	4	4	5	4	5	5	5	5	4	5	5	3	4	3	4	5	4	4	5	5	4	3	5	4	4
nishasingh9096@gmail.com	2	2	3	4	8	5	4	4	5	5	4	5	5	5	5	4	5	4	5	4	4	4	5	5	4	4	5	5	5	4	5	5	5
sudhirchaudhary1995@gmail.com	1	3	2	2	8	5	5	5	5	4	5	5	5	5	5	5	5	5	5	5	5	5	4	5	5	5	4	5	4	4	3	4	4
ngaolerou@gmail.com	2	2	3	4	7	5	5	5	4	5	5	4	4	4	3	3	4	5	4	3	4	5	3	5	4	3	4	4	5	5	5	4	5
iamkapil102@gmail.com	1	2	2	4	7	5	4	3	5	5	4	5	5	4	5	5	5	4	5	3	4	5	4	4	4	3	5	5	4	4	4	5	4
ritubhardwajkhorda@gmail.com	2	1	2	4	6	4	5	5	5	4	5	5	5	4	5	5	5	5	4	4	4	3	4	5	4	4	5	5	5	4	5	5	4
sourabhmittal8292@gmail.com	1	2	3	2	7	5	5	4	5	4	5	5	5	4	4	5	4	4	4	4	5	4	4	4	5	3	5	4	5	4	5	4	5
khekivimsumi@gmail.com	2	3	3	4	7	5	5	5	5	5	5	5	4	5	5	5	5	5	5	4	5	4	5	4	5	5	5	5	4	4	3	4	5
osusunjeetahijam@gmail.com	1	1	3	4	2	5	4	5	4	4	5	5	5	5	5	5	4	5	4	5	5	4	5	5	4	5	5	5	4	4	5	3	5
nitusaini94169@gmail.com	2	2	2	2	7	5	4	5	4	5	4	5	5	5	5	5	5	5	4	4	4	4	5	5	5	4	5	3	5	4	5	4	5
yatinmiglani0@gmail.com	1	1	3	4	7	4	4	4	5	4	4	4	4	3	4	4	3	5	4	5	5	5	4	4	4	3	4	4	4	3	5	4	5
besiieshena4@gmail.com	2	3	2	2	2	5	5	5	4	5	5	5	5	3	4	5	5	4	5	4	5	3	4	4	5	5	5	4	5	4	5	5	5
skgauditor@gmail.com	1	1	3	4	7	4	5	4	5	4	5	4	5	5	5	4	5	5	5	4	4	4	3	5	4	5	4	5	4	5	4	5	4
gautamlalit1008@gmail.com	1	1	3	2	7	5	5	5	5	4	4	5	4	5	5	4	5	4	3	4	4	4	4	5	5	5	4	5	5	4	4	5	4
vijayrathee298@gmail.com	1	3	3	4	7	5	4	5	4	4	4	5	5	5	5	4	5	5	4	4	3	4	5	5	5	4	5	3	5	5	4	5	4
seemad2421@gmail.com	2	1	2	2	2	5	5	5	4	4	3	5	5	5	5	5	5	5	5	5	5	4	5	5	4	5	4	5	5	4	4	4	3
shekhranishant@gmail.com	1	2	3	2	6	5	5	4	5	4	5	5	5	4	4	3	5	4	5	4	5	3	5	4	5	4	5	4	4	4	5	4	5
Snehabk28@gmail.com	2	1	2	2	6	5	4	5	5	5	4	5	4	5	5	4	5	4	5	4	5	3	4	4	4	5	5	4	5	5	4	5	4
mohitverma753965@gmail.com	1	1	3	4	6	5	5	5	4	4	5	4	5	4	5	5	5	3	4	4	4	4	4	5	4	5	4	5	3	4	5	4	4
annubiswakarma.04@gmail.com	1	3	2	4	2	4	5	5	5	4	4	4	5	3	5	5	5	5	5	5	4	4	4	5	5	5	4	5	5	5	5	4	5
namisha2062@gmail.com	2	1	3	2	6	5	5	4	5	4	5	4	5	5	5	4	5	5	4	4	4	5	4	5	4	3	5	4	4	4	3	4	5
keshavtomar2000@gmail.com	1	2	2	3	6	4	5	5	5	5	4	3	3	5	3	5	3	5	5	5	5	5	4	5	5	5	3	5	4	5	5	5	4
dikshasharma11155@gmail.com	2	1	2	4	5	5	4	5	3	5	3	5	5	5	5	3	4	4	4	5	5	5	5	4	5	5	4	4	4	5	4	5	4
ankittanwar176@gmail.com	1	3	3	2	2	5	5	4	5	3	5	5	5	5	4	4	5	5	4	5	4	4	5	5	5	5	4	4	5	4	5	4	5
archananew12@gmail.com	2	1	3	3	6	5	5	3	4	5	4	5	4	5	5	5	5	4	4	5	5	5	5	5	4	5	5	5	4	4	4	5	4
divydhapola26@gmail.com	1	1	3	4	6	4	5	5	5	4	5	4	5	5	5	5	5	4	5	5	5	5	5	5	4	4	4	5	5	5	4	5	5
seemapriyanka906@gmail.com	2	2	2	2	2	5	3	4	3	5	4	5	5	5	5	5	5	5	5	5	5	3	5	4	4	5	4	5	4	5	4	5	4
ritubhardwajkhorda@gmail.com	2	1	2	4	8	5	5	5	5	4	4	5	5	5	5	5	5	4	4	4	5	4	5	4	5	4	5	5	5	4	4	5	4
vishalrajput708266@gmail.com	1	1	3	2	5	4	4	3	4	5	5	3	3	3	3	3	3	5	5	3	4	5	3	4	4	3	4	4	4	5	4	5	4
Shreyan.biswas1506@gmail.com	2	2	2	3	5	2	1	2	1	2	2	1	1	2	1	1	3	1	1	2	2	1	2	2	1	1	1	2	1	1	1	2	2
anchalgoyal22222@gmail.com	2	2	3	4	2	5	4	5	5	4	4	5	5	5	5	5	5	5	4	4	4	4	5	5	5	5	4	5	5	4	5	5	5
neetugoyat31@gmail.com	2	2	2	2	6	5	5	3	5	5	4	5	4	4	4	5	5	4	5	4	5	3	5	4	4	5	5	5	4	4	5	4	5
deepikajangra69@gmail.com	2	2	3	3	6	4	5	5	5	4	5	5	5	5	5	5	5	4	4	5	5	5	4	5	4	4	5	5	4	4	5	4	5
Saxena.gagan2019@gmail.com	1	2	3	4	6	2	3	3	2	3	3	4	4	4	2	2	2	5	5	4	4	4	3	5	4	3	4	4	4	5	4	4	4
rahulsehrawat190798@gmail.com	1	2	2	2	6	4	4	5	4	4	4	5	5	4	4	4	5	5	5	4	4	5	5	5	5	5	5	4	5	4	5	5	4
ravikomal2416@gmail.com	1	2	3	1	7	2	1	2	1	2	1	3	3	2	2	2	3	2	2	1	1	1	1	2	2	1	2	2	1	1	1	2	2
rangtesing.francis@gmail.com	2	1	2	1	7	4	4	4	4	5	5	5	3	3	3	3	3	4	5	3	5	4	4	4	4	3	3	5	4	4	5	4	5
roshanjha51995@gmail.com	1	2	3	3	2	5	5	5	4	4	4	5	5	4	5	5	5	5	5	3	5	4	4	4	3	4	3	5	4	4	5	4	5
chimanshutondwal@gmail.com	1	2	2	2	7	4	4	5	5	5	4	4	4	5	4	5	4	5	5	4	4	4	5	4	5	5	5	5	4	4	4	4	5
priyanshid674@gmail.com	2	1	3	4	7	5	5	5	5	4	3	5	5	4	4	5	5	5	5	4	5	4	5	4	5	5	4	4	5	4	5	4	4
my7352140@gmail.com	1	2	2	3	7	4	5	4	4	5	4	5	5	5	5	5	5	3	4	3	4	4	4	5	4	5	5	3	4	5	4	5	5
chihantallanao@gmail.com	1	2	3	2	3	5	5	5	4	4	5	5	4	5	4	4	5	4	4	4	5	3	5	5	4	5	5	5	4	5	4	5	5
chouanshu9@gmail.com	2	1	2	4	7	5	4	5	5	4	4	4	5	4	5	4	5	4	5	5	5	4	5	4	5	5	4	4	5	5	5	4	5
mrai86184@gmail.com	2	2	2	3	7	4	5	4	4	5	5	4	3	3	4	4	4	5	5	4	5	4	3	5	4	4	4	4	3	4	5	4	5
divanshij738@gmail.com	2	2	2	2	7	5	5	5	4	4	5	5	5	5	5	4	4	5	4	4	4	4	5	5	5	5	5	4	5	5	5	4	5
donaldumdorbarca@gmail.com	1	1	3	4	3	5	4	5	5	4	4	5	3	5	4	4	4	4	4	4	4	4	4	5	5	4	5	5	4	5	4	5	4
arpitsmarty.verma@gmail.com	1	2	3	3	7	5	4	4	5	3	4	3	5	5	5	5	5	4	4	4	5	4	5	4	5	5	5	5	4	5	4	5	5
khushbuaggarwal4502@gmail.com	2	2	2	2	7	5	5	5	5	4	5	5	5	3	5	5	5	4	5	4	5	4	5	5	5	5	4	4	5	4	5	4	5
ritika@gmail.com	2	1	3	4	7	5	4	5	5	4	4	4	5	5	5	5	5	5	4	5	4	4	4	4	5	5	5	5	5	4	4	5	5
hayasakaayameko82@gmail.com	2	2	2	3	3	4	5	5	5	3	5	4	5	4	5	5	5	5	5	5	5	5	4	5	5	5	5	5	4	4	5	3	5
lakshitaschhoker7225@gmail.com	2	2	3	2	7	2	2	3	3	2	3	5	5	4	5	5	4	3	4	3	5	4	4	5	5	4	5	5	4	5	4	5	4
saif786ali95@gmail.com	1	1	2	4	3	3	2	3	2	3	3	4	3	4	2	3	3	4	5	5	5	5	4	4	4	4	3	3	5	5	5	5	4
partharora0809@gmail.com	1	2	3	2	3	5	4	4	5	4	5	3	5	5	5	5	5	4	5	4	4	4	4	4	3	4	5	4	5	4	5	4	5
saurabhnegi21@gmail.com	1	2	2	3	3	5	4	5	5	5	4	4	4	4	5	4	3	5	4	5	5	5	5	4	3	4	5	5	4	4	5	4	5
mushimshiu1@gmail.com	2	1	3	2	3	5	5	4	5	3	4	4	4	4	5	5	5	4	5	3	4	4	5	4	5	4	4	5	5	4	5	4	5
sagar.age21@gmail.com	1	2	2	4	3	4	5	5	4	5	5	4	5	5	5	4	4	4	5	5	4	4	5	5	5	4	4	5	5	4	4	5	4
amanzaidi464@gmail.com	1	2	2	1	6	5	4	5	4	4	3	5	5	5	5	4	4	5	5	5	5	5	5	5	5	5	4	5	4	5	4	5	4
Soshonshatsang3135@gmail.com	1	1	3	3	6	3	3	5	5	5	4	5	5	4	5	5	4	5	4	3	4	4	4	5	5	5	5	4	5	4	5	4	4
poonam1541@gmail.coom	2	2	2	2	3	5	3	5	4	4	4	5	5	5	5	5	5	4	4	5	4	4	5	5	3	4	3	4	5	4	4	4	5
khatoonshahnaz31@gmail.com	2	2	3	1	7	3	4	3	4	5	5	3	3	4	3	3	3	5	4	5	3	3	3	4	4	4	4	4	3	4	5	4	4
kamesh98438@gmail.com	1	1	2	3	7	5	4	5	5	3	4	4	5	5	5	5	5	4	5	5	4	4	5	4	5	4	4	5	5	4	3	4	4
sagardhingra05@gmail.com	1	2	3	2	6	5	4	3	4	3	4	4	5	4	5	5	4	4	4	3	3	4	4	5	3	4	5	5	4	3	5	4	5
manmohankumar6386@gmail.com	1	2	3	1	3	5	5	4	4	4	5	4	4	4	4	5	5	4	4	4	3	4	5	4	4	5	5	5	4	4	5	4	5
rianggangmei@gmail.com	2	1	2	2	7	5	5	5	3	4	3	5	5	4	4	4	4	5	4	4	4	4	4	5	5	5	5	5	5	4	4	4	4
rknew1611@gmail.com	2	2	2	3	6	4	5	4	5	4	5	5	5	5	5	5	5	5	5	5	5	5	4	5	5	5	4	5	5	4	5	3	4
kgivingsonkamei7991@gmail.com	2	2	3	1	3	5	3	5	3	5	3	5	5	5	4	5	4	5	4	3	5	5	5	4	5	4	5	5	4	5	5	4	5
preshitamang@gmail.com	2	2	2	4	6	5	3	5	5	3	5	4	4	5	4	5	4	4	5	5	4	5	5	4	5	5	5	5	4	5	4	5	4
pulkithasija@gmail.com	1	2	2	2	6	5	5	4	5	5	4	5	5	5	5	4	5	4	5	4	5	5	4	5	5	4	3	4	5	4	5	4	4
rongsenjamir540@gmail.com	1	2	2	1	3	5	5	4	5	4	4	5	5	4	5	5	5	5	5	3	4	5	4	5	4	4	5	4	4	5	4	4	5
mrsahiljatrana9728@gmail.com	1	2	2	2	7	5	3	5	5	3	5	5	5	5	5	5	4	4	5	3	5	4	4	5	3	5	5	5	4	5	4	5	5
lamatamangtamanna@gmail.com	2	2	2	1	8	5	5	5	4	4	5	5	4	4	5	3	5	4	4	4	5	4	4	5	5	5	4	5	4	5	4	5	4
neha.dotania09@hotmail.com	2	2	3	2	3	3	5	5	3	3	4	5	5	4	4	5	5	5	5	4	5	4	4	4	5	5	5	5	5	5	4	5	4
banweenossan1998@gmail.com	2	2	3	4	6	5	5	4	5	4	3	5	4	5	5	5	5	5	5	5	5	5	5	4	5	5	5	4	4	5	5	4	5
Idohangbehau881@gmail.com	1	2	3	3	6	3	5	5	3	5	5	5	5	4	5	5	4	4	5	4	4	4	5	4	5	4	3	5	4	4	5	4	5
ishu.sh0087@gmail.com	2	2	2	4	3	5	5	5	5	4	3	5	5	5	5	4	5	5	4	4	5	5	3	5	4	4	5	5	5	5	4	4	5
swatisahu1678@gmail.com	2	3	3	2	6	4	5	3	5	5	5	5	5	5	5	5	4	4	5	4	5	5	3	5	5	5	5	4	5	4	5	4	4
sanjeev82014@gmail.com	1	2	3	3	6	5	4	5	3	4	3	5	5	4	4	5	5	4	4	4	4	4	4	5	4	5	4	5	5	4	4	5	4
deepachoudhary088@gmail.com	2	2	3	2	6	5	4	5	5	5	4	5	5	4	5	5	5	5	4	4	4	4	5	4	5	4	5	4	5	4	5	4	5
yogesh.uniyal01@gmail.com	1	2	2	3	3	5	5	5	5	4	5	5	4	5	4	3	4	5	5	4	4	5	5	5	4	5	4	5	4	4	4	4	4
abhishekrawat387@gmail.com	1	2	3	2	8	5	5	5	5	5	4	5	5	5	5	5	5	4	5	3	3	3	4	4	5	5	5	3	5	4	5	4	4
Ravikashyap665@gmail.com	1	2	2	3	7	5	5	5	5	3	5	5	5	5	5	5	4	5	5	4	4	4	4	4	5	3	5	5	5	4	5	4	5
reetuchoudhary088@gmail.com	2	3	3	2	3	5	5	3	5	4	3	5	5	4	5	5	5	4	4	5	5	4	5	5	4	5	5	5	5	4	5	4	5
swapy20x@gmail.com	2	2	2	3	7	4	5	5	4	3	4	5	5	4	5	5	5	5	4	4	5	4	4	5	5	5	5	4	5	3	5	4	4
sarikasuthar2607@gmail.com	2	2	2	2	8	5	4	5	5	4	3	5	5	5	5	5	5	5	4	4	4	4	5	4	5	5	4	5	3	4	4	5	4
ayushiii.0922@gmail.com	2	2	3	3	3	4	5	3	5	4	3	5	4	4	3	5	5	4	4	3	4	5	4	5	4	4	4	5	5	4	5	4	5
ohiyahpk@gmail.com	2	3	2	3	4	5	3	5	5	5	4	4	5	4	4	5	5	4	5	5	4	3	4	5	4	3	5	5	5	3	4	4	5
hriiziirourozhemai@gmail.com	2	2	2	2	3	5	5	5	5	4	5	5	5	3	5	5	4	4	4	5	4	4	5	5	5	4	4	3	4	4	5	5	4
manishabarua12@gmail.com	2	2	3	3	8	5	4	5	5	3	4	5	5	4	5	4	5	5	4	3	3	3	4	4	5	5	4	5	3	4	4	4	5
himanibhardwaj0409@gmail.com	2	2	3	3	3	4	3	4	5	4	5	5	5	5	4	4	5	5	5	5	5	5	5	5	4	5	5	4	5	4	4	5	4
payalgulia21@gmail.com	2	2	2	2	4	5	4	5	5	4	4	4	4	4	3	5	4	4	4	5	5	4	5	5	4	4	5	5	4	4	5	4	3
maheshworikumam97@gmail.com	1	3	3	3	4	5	5	3	4	5	5	4	3	4	3	3	4	5	5	5	5	5	4	4	5	5	4	4	5	4	4	5	4
shikharathor27@gmail.com	2	2	2	2	4	3	5	4	5	4	3	4	3	4	4	4	3	5	4	3	4	3	3	4	4	3	5	4	4	4	4	4	4
prernasri2002@gmail.com	2	2	3	2	3	5	5	5	5	4	5	4	4	3	3	3	3	5	4	5	5	5	4	5	3	5	5	5	5	4	5	4	4
Panwarmayank099@gmail.com	1	1	2	4	7	5	4	5	5	5	3	5	5	4	5	4	4	5	5	5	5	5	5	4	5	4	5	5	5	3	5	4	4
nehagupta1553@gmail.com	2	2	2	4	4	5	4	3	4	4	5	5	5	5	5	5	3	4	4	5	5	5	5	4	4	5	5	5	4	4	5	4	5
jangra.misha30@gmail.com	2	2	3	2	3	4	5	5	4	5	4	4	5	4	4	5	5	4	4	4	5	4	5	4	4	3	5	5	5	5	4	4	4
nishagoyat8053@gmail.com	2	2	3	3	4	4	5	5	4	3	5	4	3	5	5	5	5	4	5	4	5	5	5	5	4	3	5	5	5	4	5	4	4
rahultanti8787@gmail.com	1	3	3	3	3	5	3	5	5	4	3	5	4	4	5	4	3	5	4	5	5	5	5	4	5	4	4	4	5	4	5	4	5
sangwanm0888@gmail.com	2	2	2	3	8	5	5	5	3	5	4	5	5	5	5	5	4	4	5	4	4	4	4	4	4	5	4	4	4	4	5	4	4
shilparathor50@gmail.com	2	2	3	2	3	5	3	5	5	5	3	5	5	5	4	5	5	5	5	3	5	3	4	4	5	5	5	5	5	4	5	3	4
gujjarsneha419@gmail.com	2	3	2	4	4	5	4	4	5	4	4	4	4	4	5	5	5	4	5	3	4	4	3	5	4	3	4	4	4	4	5	4	4
pv697969@gmail.com	2	2	2	3	3	5	4	5	5	4	5	4	5	5	4	3	5	4	5	5	3	3	5	5	5	5	5	4	5	4	5	4	5
annuindora57@gmail.com	2	2	3	4	3	5	5	4	5	3	4	4	5	5	4	5	5	5	4	3	4	4	3	5	4	4	5	3	5	4	5	4	3
shruti127021@gmail.com	2	1	2	2	8	5	3	4	4	4	3	5	4	5	5	5	4	4	4	3	4	4	4	4	5	4	4	5	5	4	5	3	4
pissimil2@gmail.com	2	2	3	4	8	4	5	5	4	4	3	4	5	5	5	5	5	4	4	4	4	5	4	4	5	5	5	5	4	3	5	4	4
nigotia.sweta614@gmail.com	2	2	2	3	7	5	4	5	5	5	5	5	5	5	5	5	4	5	4	3	4	5	4	5	5	4	5	4	5	5	4	3	4
snaynochhetri1327@gmail.com	2	3	2	3	3	3	5	5	4	3	4	5	5	5	5	5	5	2	1	2	5	2	2	5	4	3	4	5	4	4	5	4	5
amitrohilladec22@gmail.com	1	2	3	2	7	5	5	3	5	5	4	5	5	5	5	5	5	5	5	3	4	5	4	5	4	5	5	5	5	4	4	5	4
Deswalsweety@gmail.com	2	2	2	2	3	5	5	5	5	4	3	5	5	4	5	4	5	4	4	3	4	4	4	4	5	4	5	5	4	5	4	5	4
manjeetkohar697@mail.com	2	1	3	2	8	4	4	3	5	5	4	4	5	5	5	5	5	5	4	4	5	4	5	5	4	4	5	4	5	4	4	4	5
yadavdeepika1012@gmail.com	2	2	3	4	3	3	5	5	5	4	5	5	5	5	5	4	5	5	5	4	4	5	5	4	4	4	5	4	5	5	5	4	5
soshonshatsang3135@gmail.com	2	2	2	3	8	1	2	1	2	1	1	1	3	2	2	1	2	1	1	2	3	2	1	1	1	1	1	1	1	1	1	1	2
yanz41208@gmail.com	2	1	3	4	3	4	5	5	5	3	5	5	5	5	5	5	3	4	4	5	4	4	5	4	5	5	5	5	5	4	5	4	5
akashsharma681996@gmail.com	1	2	2	2	3	5	5	5	4	5	4	4	5	5	3	5	5	4	5	5	5	4	5	4	5	4	5	4	5	4	5	4	4
radhikarajput91917@gmail.com	2	2	2	3	3	5	3	5	5	3	5	4	5	5	4	5	5	5	4	5	5	5	4	5	5	5	5	5	4	3	3	5	4
vaveineflorence@gmail.com	2	3	3	4	7	4	3	5	4	4	5	4	5	5	5	5	3	4	5	4	4	4	5	4	5	5	5	4	5	4	5	4	5
throngkhumlims@gmail.com	2	2	3	4	7	2	5	5	4	5	4	5	5	5	5	5	5	4	4	5	4	5	4	5	5	4	5	5	5	4	4	4	5
shikharathor27@gmail.com	2	2	2	3	3	5	5	3	3	3	5	5	5	5	4	5	4	5	5	3	4	4	3	5	5	4	4	5	5	4	5	4	5
atyant.arya2000@gmail.com	2	2	3	3	3	5	4	5	5	4	3	4	5	4	3	5	5	5	4	4	5	4	5	4	5	5	5	3	4	3	4	4	4
amanzaidi464@gmail.com	2	2	2	2	3	4	5	3	5	3	5	5	5	5	4	4	4	4	4	5	5	5	5	4	4	5	4	5	5	4	5	3	4
joshitushar6061@gmail.com	1	2	2	1	3	4	5	5	5	4	4	4	5	4	3	3	5	5	3	4	4	3	4	4	5	5	5	5	4	4	5	4	4
kaushikdeepika649@gmail.com	2	3	3	2	7	5	3	4	5	5	5	5	5	4	4	3	4	5	5	5	5	5	4	5	5	5	5	5	3	4	5	4	4
tusharkhanna580@gmail.com	1	3	2	4	7	4	5	5	5	4	4	5	5	5	5	3	5	2	2	2	2	2	1	5	4	5	5	5	5	4	5	4	5
yabhi9270@gmail.com	2	2	2	3	5	5	5	5	4	4	5	5	5	5	3	5	4	5	5	5	5	5	5	5	5	5	5	5	5	4	4	4	5
ridhimamehta79@gmail.com	2	2	3	4	3	1	1	2	2	1	1	2	3	3	3	3	3	4	5	4	4	3	4	2	2	2	1	1	1	1	2	1	1
deepeshshingh24@gmail.com	1	2	2	2	3	3	5	4	5	4	5	5	5	3	5	5	4	5	5	4	5	5	5	4	5	3	5	5	5	4	5	5	4
ashishsingh96677@gmail.com	1	3	3	3	6	4	3	5	4	5	3	5	5	5	5	5	5	4	5	4	4	3	5	5	4	5	4	5	5	5	5	4	4
chonshimray1234@gmail.com	1	2	2	1	7	4	5	3	4	4	4	5	5	4	5	4	5	4	4	3	3	4	4	5	4	3	4	4	3	4	5	4	5
suryansh143k@gmail.com	1	2	3	1	7	5	5	5	5	4	3	3	5	5	5	5	5	4	5	4	4	3	3	4	5	4	5	5	5	4	5	4	4
shikhapanghal333@gmail.com	2	3	2	2	7	4	5	3	4	3	4	4	3	5	5	4	5	5	4	3	5	4	4	4	3	3	4	3	3	4	4	5	4
parmeetnain250@gmail.com	1	2	3	3	8	3	4	3	4	4	3	3	4	3	4	3	4	4	3	5	5	4	4	4	4	3	4	3	4	4	4	4	5
snehaphogat1904@gmail.com	2	2	2	1	8	4	5	4	3	3	5	4	3	3	1	1	1	4	4	3	4	3	5	4	3	4	4	4	5	4	5	4	4
suryapandita16@gmail.com	2	2	2	3	8	5	5	5	3	5	4	4	4	4	5	4	4	4	4	5	5	5	5	4	4	5	4	4	5	5	4	4	5
anshulsingh1719@gmail.com	1	3	3	2	7	5	5	5	5	5	5	4	5	5	4	3	4	4	5	5	5	5	4	5	4	5	4	4	4	4	5	4	4
itzmohit93@gmail.com	1	2	2	4	5	2	2	1	2	1	1	1	1	3	3	3	3	5	4	3	4	3	3	5	3	3	4	1	2	1	1	1	1
niteshkinha98@gmail.com	1	2	2	1	7	5	3	5	5	5	5	5	5	5	3	3	3	4	4	5	4	4	4	4	3	5	5	5	5	4	5	4	4
sakshikinha28@gmail.com	2	2	3	4	6	5	5	4	5	5	3	4	5	5	3	4	3	5	4	5	4	5	5	5	5	4	5	5	5	3	5	5	4
pv431065@gmail.com	2	3	2	2	7	5	5	5	5	4	4	5	5	5	4	4	5	4	5	5	4	4	4	5	5	5	5	5	4	4	4	4	3
sethiritika85@gmail.com	2	1	2	1	8	3	5	4	4	3	5	3	3	3	3	4	5	5	4	3	4	3	3	4	4	3	4	5	5	4	5	4	4
choudharyreetu43@gmail.com	2	2	3	4	7	2	4	4	3	5	3	2	5	3	4	5	2	2	5	5	3	2	2	5	1	2	4	2	3	4	5	4	4
jiyasumman@gmail.com	2	2	3	2	8	5	5	5	5	4	5	5	5	5	5	4	5	5	5	4	5	5	5	5	5	5	3	5	4	4	4	4	4
at890m@gmail.com	1	1	3	4	7	4	5	4	3	5	4	5	5	5	5	5	5	5	4	5	5	4	4	5	5	3	5	5	5	3	5	5	4
21msp01@lingayasvidyapeeth.edu.in	2	2	3	1	7	4	4	3	4	3	5	4	3	4	3	4	3	4	4	3	4	4	3	4	3	4	5	3	5	4	4	4	5
Yadavnitinsunny@gmail.com	1	1	2	4	6	4	5	4	3	4	4	4	4	5	3	3	5	5	4	4	4	4	4	4	4	5	4	4	5	5	5	4	4
hemikakhundia@gmail.com	1	3	2	3	7	5	5	5	5	4	3	4	5	5	3	3	3	4	5	4	4	4	5	4	5	5	5	5	5	4	5	5	4
babliyadav1524@gamil.com	2	2	3	1	6	5	5	4	4	5	5	5	3	5	4	4	5	5	4	3	5	4	3	4	4	3	5	5	5	4	4	4	4
annughanghal@gmail.com	2	2	2	1	6	4	5	4	3	3	5	5	4	4	3	3	3	5	5	4	4	3	4	4	5	4	4	4	4	4	4	4	3
bagrisudha782@g.mail.com	2	1	2	1	6	4	4	3	4	5	4	4	3	4	3	3	3	1	1	2	2	3	1	5	5	3	4	4	4	4	5	4	4
sachin216200000@gmail.com	1	2	3	2	5	4	4	5	4	4	5	4	5	4	5	5	4	5	5	3	3	3	4	4	4	4	4	4	4	5	5	4	4
rrashmi192000@gmail.com	2	3	2	3	5	5	5	5	4	5	5	5	5	5	4	4	4	5	4	4	4	3	5	4	5	5	5	5	5	4	5	4	5
nidhiguptang150@gmail.com	2	2	3	1	4	3	2	3	5	5	4	5	5	5	2	5	2	2	2	3	3	2	2	4	3	4	3	3	3	5	5	4	4
rathore.sonu25@gmail.com	1	1	3	3	5	5	5	5	5	3	5	5	5	5	4	4	4	5	5	3	3	4	4	4	5	5	5	5	5	3	5	4	4
sainmanisha2001@gimal.com	2	2	2	4	5	5	5	3	5	4	3	5	4	5	5	3	3	5	4	5	4	4	5	5	5	5	5	5	5	4	5	4	5
sharwanarajun4474@gmail.com	1	1	2	3	4	4	4	4	4	5	5	4	4	4	4	2	4	4	4	4	3	3	5	4	4	4	4	4	4	4	5	4	4
my3202797@gmail.com	2	2	3	2	5	3	4	3	4	4	4	4	4	4	4	4	4	5	4	5	4	5	5	5	4	3	5	5	5	4	5	5	4
sonisaini9057@gmail.com	2	1	2	4	6	5	5	5	5	5	5	5	5	5	4	4	3	4	4	4	5	5	5	5	5	5	5	5	5	4	5	4	4
sureshkumar725@gmail.com	1	2	3	3	6	3	3	5	3	4	5	5	5	5	5	3	3	4	4	3	4	5	4	4	3	3	4	3	4	4	5	5	5
shivam.paall46@gmail.com	1	3	3	1	5	4	4	4	4	5	4	4	5	4	5	5	5	2	2	2	3	3	1	4	5	5	4	4	4	4	5	4	4
diksharohilla324@gmail.com	2	1	2	4	4	5	4	4	4	5	4	5	5	4	5	5	5	5	5	5	5	5	5	5	5	3	3	3	3	4	5	4	4
keshavfurniture.ke@gmail.com	1	2	3	3	5	2	2	3	2	2	3	5	5	5	5	4	4	5	5	3	3	4	5	5	4	3	5	5	5	3	5	4	5
mamtabhukkal33@gmail.com	1	3	2	1	6	2	3	2	2	2	3	4	4	4	5	5	5	4	4	4	3	3	3	3	5	3	3	3	4	5	5	4	3
vishalraomandhiya@gmail.com	1	2	3	3	5	5	5	4	4	5	5	4	3	4	5	3	3	5	4	5	5	5	4	4	5	4	3	4	4	5	3	4	4
ravititani63@gmail.com	1	1	2	3	4	5	5	5	5	4	4	5	5	5	3	3	3	4	4	4	3	3	5	4	5	5	5	5	5	4	4	5	5
tanusinglats45@gmail.com	2	3	2	1	5	2	1	2	1	1	2	1	1	1	3	3	3	4	5	2	1	1	2	1	1	3	3	3	2	1	2	1	2
ravinajaglan8358@gmail.com	1	2	3	3	6	4	5	4	4	5	4	5	4	4	4	5	4	4	5	4	5	4	4	5	5	5	4	5	4	4	5	5	4
m.mittal88@gmail.com	2	2	2	3	5	4	5	5	4	4	5	5	5	4	4	3	4	4	5	4	4	4	5	4	5	5	4	4	5	4	4	4	4
gouravkumar813@gmail.com	1	3	2	1	4	2	2	3	3	3	2	5	4	4	5	4	4	4	5	5	5	4	4	5	5	5	4	4	5	4	4	4	5
guptadeepak098@gmail.com	1	1	2	3	5	4	5	4	5	4	5	5	5	4	5	4	5	4	4	4	5	4	5	5	4	5	5	4	4	4	5	4	4
multanubi13@gmail.com	1	2	2	3	4	5	4	4	4	5	4	5	4	3	4	4	4	4	5	4	5	4	4	5	4	5	4	3	4	5	4	5	4
roopa.hartron@gmail.com	2	2	2	1	5	4	5	4	4	5	5	4	4	4	4	3	4	5	4	5	4	5	4	4	5	4	4	5	5	4	4	4	5
kranthi1949@gmail.com	2	2	2	3	4	5	5	4	3	4	3	5	4	4	4	5	4	5	5	4	5	5	3	4	5	5	4	4	4	4	5	4	5
sainiinderjeet25@gmail.com	1	2	2	3	4	5	4	4	4	3	5	4	5	5	4	4	4	5	4	5	4	4	4	4	5	4	4	4	5	3	5	4	4
ks5416@gmail.com	2	2	2	1	5	4	5	4	5	5	4	4	4	3	3	4	4	5	5	5	4	5	4	5	5	4	5	4	3	4	4	5	4
ravirana192@gmail.com	1	3	2	3	5	4	5	4	4	4	4	4	5	5	4	4	4	5	5	4	4	5	5	5	5	5	5	5	5	4	5	4	4
Surinderjit.Singh1987@gamil.com	1	2	2	3	4	4	5	5	4	5	5	5	4	4	5	4	4	4	5	5	4	4	5	4	4	4	5	4	3	4	4	4	5
bhati4636@gmail.com	2	3	2	1	4	4	5	5	4	4	5	4	3	3	5	4	4	5	5	5	4	4	5	5	5	4	3	4	5	4	5	3	4
pandittejasandroid@gmail.com	1	2	2	3	5	5	5	4	5	4	5	5	4	4	4	5	4	4	5	4	4	5	4	4	5	4	4	5	4	4	5	4	5
Vanditapopli8896@gmail.com	2	3	2	4	5	4	5	4	4	5	5	4	4	4	5	5	4	5	4	5	4	5	4	4	5	4	5	4	4	5	4	4	5
ajaydanalpur1992@gmail.com	1	2	2	1	4	4	5	4	4	4	5	5	4	4	5	4	4	5	5	4	5	4	5	4	5	4	4	3	5	4	5	4	4
230000507001@cblu.edu.in	1	3	2	3	4	5	5	5	5	5	4	5	4	4	5	4	4	5	5	4	5	4	4	5	5	4	4	4	4	4	5	3	4
Veenuspopli@gmail.com	2	2	2	4	5	5	5	4	5	4	5	5	4	5	4	5	4	4	4	5	5	4	5	4	4	5	4	4	4	5	4	5	5
drmlchawla@gmail.com	2	2	2	3	5	5	5	4	5	4	5	4	4	5	4	4	5	4	5	5	4	4	5	4	5	4	4	4	5	4	4	4	5
deepakgujjar8576@gmail.com	1	2	2	1	4	5	4	5	4	5	4	5	4	5	4	4	4	5	4	5	4	4	4	5	4	5	4	5	4	5	4	5	4
kanikakalra008@gmail.com	2	2	2	3	5	4	5	5	5	4	5	4	5	4	4	5	4	4	4	5	4	5	5	4	5	4	5	5	3	5	4	4	5
Sanjayv66may@gmail.com	1	1	2	4	4	4	4	5	5	3	4	4	5	4	5	4	5	5	5	4	5	4	5	5	4	4	4	5	4	5	5	5	4
Deepakbhadu29@gmail.com	1	3	2	4	5	4	5	4	5	4	5	4	4	5	4	5	4	4	5	4	5	5	5	4	4	4	4	5	4	5	4	4	4
omkus7017@gmail.com	2	2	3	1	4	5	4	5	4	5	4	5	4	5	5	4	5	4	5	4	4	3	5	4	5	3	5	4	5	5	5	3	4
Ruparelruchi6@gmail.com	2	3	2	3	5	5	5	4	4	5	4	4	4	5	4	5	5	4	5	3	4	4	5	4	5	4	4	5	4	5	4	5	5
Arjunjoshi84693@gmail.com	1	2	2	4	5	4	5	4	5	4	5	4	5	4	4	5	4	4	4	4	5	4	4	4	3	4	4	4	5	5	4	5	4
akshay95373@gmail.com	1	2	2	1	4	5	4	4	5	4	5	4	5	4	5	4	5	5	5	4	5	4	5	4	5	3	4	5	4	5	5	4	5
saurabhjuneja30@gmail.com	1	3	2	3	5	4	5	4	5	5	4	4	5	5	5	4	5	4	5	5	4	3	4	4	5	4	5	4	5	4	5	4	4
vbahotra@gmail.com	1	1	2	4	4	4	5	4	4	5	4	5	4	5	5	4	5	4	4	4	5	4	4	5	4	5	4	5	4	4	5	4	4
balbirsingh85@yahoo.co.in	1	3	2	3	5	4	4	5	5	4	5	4	5	5	4	4	4	5	5	4	4	5	4	5	4	5	4	5	4	5	4	5	5
meenakshij5298@gmail.com	2	3	2	1	4	5	4	4	5	3	4	5	4	5	4	5	4	5	5	5	4	5	4	5	4	5	5	4	5	4	5	4	4
shivkashyaprajput@gmail.com	1	2	3	3	5	5	4	4	5	4	5	5	4	5	4	5	4	5	4	5	4	4	5	4	5	4	5	4	5	4	5	4	4
satwant22015@gmail.con	1	3	2	4	5	4	5	5	4	5	4	5	5	4	5	4	4	5	4	5	5	5	4	4	5	4	5	5	5	4	4	5	5
shakun.dev25001@gmail.com	1	1	2	3	4	5	4	4	5	4	5	5	4	5	5	4	5	5	5	3	4	3	4	4	4	5	4	4	5	4	5	4	5
lokeshsinghal1997@gmail.com	1	3	2	1	5	5	4	4	5	4	4	4	5	4	5	4	5	5	4	4	5	4	5	4	5	4	5	4	3	4	4	5	4
iamkraashish@gmail.com	1	1	2	4	4	5	5	5	5	5	3	5	5	4	4	5	4	4	4	5	4	5	4	5	4	4	5	4	5	4	4	4	5
ankushtanwar33@gmail.com	1	3	2	4	5	5	4	5	4	4	5	4	4	4	4	4	4	5	4	5	4	5	3	4	5	4	5	4	5	3	5	4	4
tanyasharma8601@gmail.com	2	2	2	4	5	4	5	4	5	5	4	3	5	4	5	4	3	5	4	4	5	4	4	5	4	4	4	4	5	4	4	4	3
Jaintanisha956@gmail.com	2	2	2	1	4	4	4	5	4	4	4	5	4	4	4	4	4	5	4	5	4	3	4	5	4	5	4	5	4	4	5	3	4
reetug041@gmail.com	1	1	1	5	2	4	5	5	5	5	3	4	4	5	5	5	5	5	5	3	4	4	4	4	4	4	4	4	5	5	5	5	3
