# Supplementary material
Source: Research Square preprint supplement (doi:10.21203/rs.3.rs-9309805/v1)
Supplement: Supplementary file 1 [file acc8b5be0b02a9699eb06d89.docx]

**Appendix A**

| Construct | Measurement Item | Source |
| --- | --- | --- |
| Spirituality | SP 1: I feel a daily sense of connection to the universe motivates me to make mindful cosmetic purchase choices. |  |
|  | SP 2: I prefer cosmetic products that use resources efficiently and have a lower environmental impact.  SP 3: I consider ethical and environmental issues when deciding which cosmetics to buy. | (Sharma & Sharma, 2017) |
|  | SP 4: I prefer to buy cosmetics from brands that are reliable, responsible and environmentally conscious. |  |
|  | SP 5: My feeling of connection to all living beings leads me to choose cosmetics that do not harm animals or nature. |  |
|  | SP 6: My sense of a higher presence inspires me to choose cosmetic products that support sustainability. |  |
|  |  |  |
| Karmic Beliefs | KB 1: My belief in karma encourages me to prefer ethical cosmetic products. |  |
|  | KB 2: My belief in rebirth influences me to support eco-friendly cosmetic brands. | (Duong, Doan, et al., 2024) |
|  | KB 3: Belief in a cyclical universe influences me to choose nature-friendly cosmetics. |  |
|  | KB 4: My belief in an endless universe motivates me to choose sustainable cosmetics. |  |
|  | KB 5: I believe using eco-friendly cosmetics helps create positive outcomes. |  |
|  | KB 6: I believe choosing harmful cosmetics leads to negative consequences for the environment. |  |
| Mindfulness | MF 1: I am conscious of the emotional factors affecting my cosmetic purchases. | (Brown & Ryan, 2003) |
|  | MF 2: I can clearly express my feelings about the cosmetic products I choose. |  |
|  | MF 3: I consider the ingredients and environmental impact when evaluating cosmetic products. |  |
|  | MF 4: When evaluating cosmetic products, I stay fully focused on their ingredients and environmental impact. |  |
|  | MF 5: I sometimes criticize myself for making cosmetic choices that are not sustainable. |  |
|  | MF 6: I often judge whether my thoughts about cosmetic products are good or bad for the environment. |  |
| Attitude towards sustainable cosmetics | ATT 1: I believe that purchasing sustainable cosmetic products is favourable. | (Maichum et al., 2016) |
|  | ATT 2: I believe that purchasing sustainable cosmetic products is safe. |  |
|  | ATT 3: I believe that using sustainable cosmetic products will help reduce pollution and improve the environment. |  |
|  | ATT 4: I believe that using sustainable cosmetic products will help reduce the wasteful use of natural resources. |  |
|  | ATT 5: I believe that using sustainable cosmetic products will help in conserving natural resources. |  |
| Intention to purchase sustainable cosmetics | IN 1: I intend to purchase sustainable cosmetic products next time because of their positive environmental contribution. | (Maichum et al., 2016) |
|  | IN 2: I plan to purchase more sustainable cosmetic products rather than conventional cosmetic products. |  |
|  | IN 3: I would buy sustainable cosmetic products if I see them available in a store. |  |
|  | IN 4: I would actively seek out sustainable cosmetic products when shopping. |  |
|  | IN 5: I would recommend and encourage others to purchase sustainable cosmetic products. |  |
